# Supplementary material
Source: HighWire-hosted journal article supplement (https://jech.bmj.com/content/jech-2019-213085)
Supplement: inline-supplementary-material-1 [file inline-supplementary-material-1.pdf]

**SUPPLEMENTARY REFERENCES**

**S1** Last J, ed. A dictionary of epidemiology, fourth edition. Oxford: Oxford University Press, 2001.

**S2** Burns J, Boogaard H, Polus S, et al. Interventions to reduce ambient particulate matter air pollution and their effect on health. *Cochrane Database Syst Rev* 2019;5:CD010919.

**S3** Hombali A, Solon J, Venkatesh B, et al. Fortification of staple foods with vitamin A for vitamin A deficiency. *Cochrane Database Syst Rev* 2019;5:CD010068.

**S4** Goudet S, Bogin B, Madise N, et al. Nutritional interventions for preventing stunting in children (birth to 59 months) living in urban slums in low- and middle-income countries (LMIC). *Cochrane Database Syst Rev* 2019;6:CD011695.

**S5** von Philipsborn P, Stratil J, Burns J, et al. Environmental interventions to reduce the consumption of sugar-sweetened beverages and their effects on health. *Cochrane Database Syst Rev* 2019;6:CD012292.

**S6** Centeno Tablante E, Pachón H, Guetterman H, et al. Fortification of wheat and maize flour with folic acid for population health outcomes. *Cochrane Database Syst Rev* 2019;7:CD012150.
